# Supplementary material
Source: Springer Nature journal article supplement (https://www.springermedizin.de/resource/supplementary/12885_2010_2537_MOESM6_ESM.pdf/9462450)

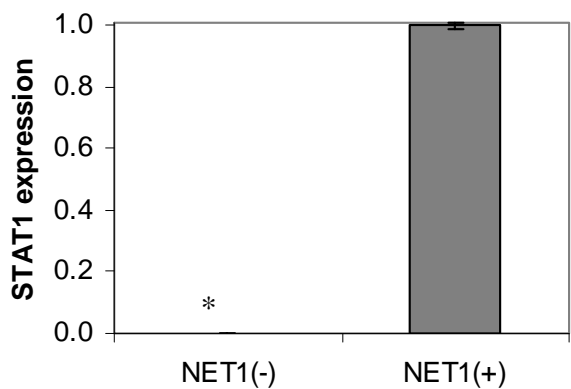

**A**

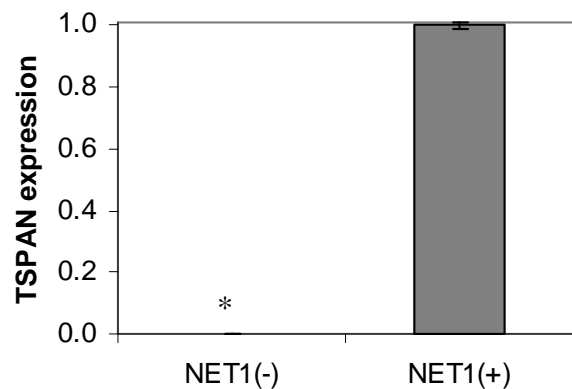

**B**

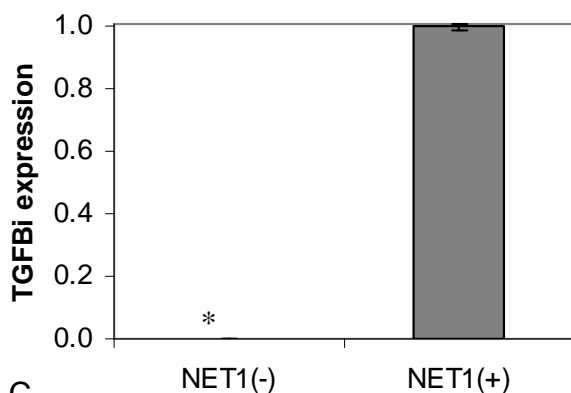

**C**

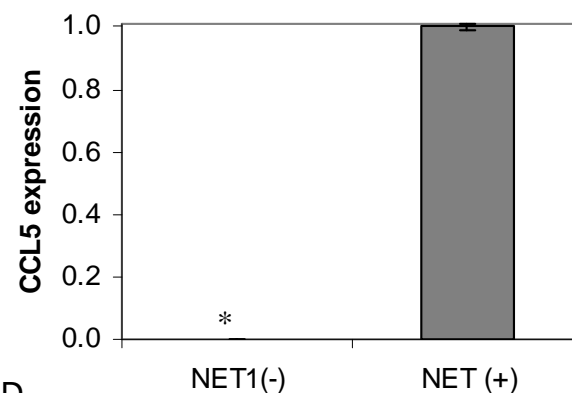

**D**

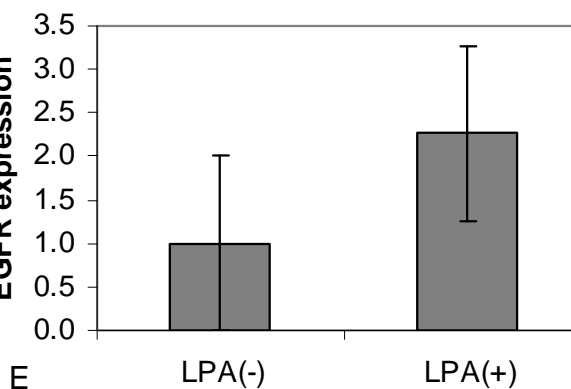

**E**

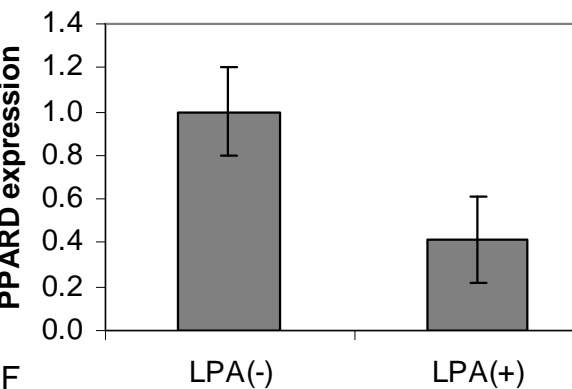

**F**

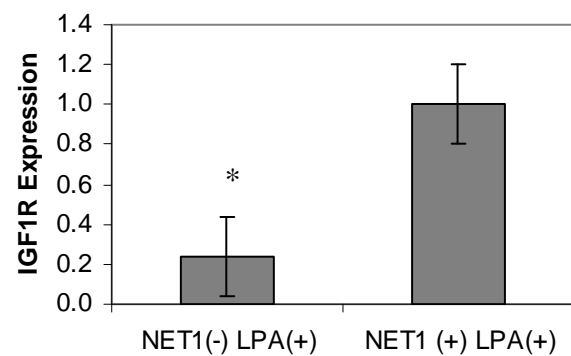

**G**

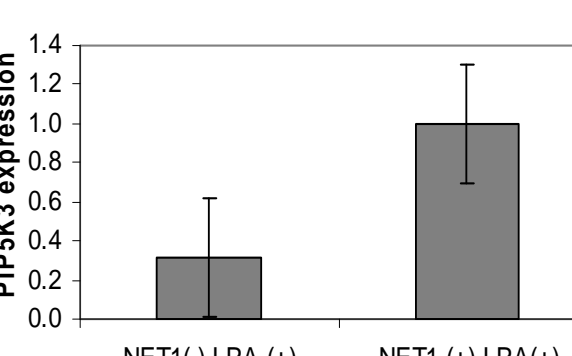

**H**

Supplement: MOESM6 [file 9462450]
